# Supplementary material for: Isolation and Characterization of a Novel Dicistrovirus Associated with Moralities of the Great Freshwater Prawn, Macrobrachium rosenbergii
Source: PubMed Central journal article supplement (PMC4783938; doi:10.3390/ijms17020204), 2016-02-02
Supplement: ijms-17-00204-s001.pdf [file ijms-17-00204-s001.pdf]

# Supplementary Materials: Isolation and Characterization of a Novel Dicistrovirus Associated with Morbidities of the Great Freshwater Prawn, *Macrobrachium rosenbergii*

Xiaoyi Pan, Zheng Cao, Junfa Yuan, Zhengli Shi, Xuemei Yuan, Lingyun Lin, Yang Xu, Jiayun Yao, Guijie Hao and Jinyu Shen

Table S1. Oligonucleotide primers used for full genome sequencing.

| Oligonucleotide Designation | Reaction    | Oligonucleotide (5'→3')                | Genome Position | Orientation |
|-----------------------------|-------------|----------------------------------------|-----------------|-------------|
| R517                        | 5' RACE     | GTCGGAATCTTGTTTCGGTAATC                | 517–496         | ←           |
| R1021                       | 5' RACE     | TTCAAGCCAGGCACCAATAA                   | 1021–1002       | ←           |
| F1044                       | Gap-filling | ACAGTGCGGCTTCACCTAAA                   | 1044–1063       | →           |
| R2061                       | Gap-filling | CTACGCATCCCAACCAAAGC                   | 2061–2042       | ←           |
| F2441                       | Gap-filling | TATGGAGATGCTGGATGTGG                   | 2441–2460       | →           |
| R3273                       | Gap-filling | TTCAGGGACTCGGTCAGAT                    | 3273–3255       | ←           |
| F3222                       | Gap-filling | GCTTTGCTACTGACTGGTTG                   | 3222–3241       | →           |
| R4813                       | Gap-filling | CTTTGCTTCAAAACCTTGCC                   | 4813–4794       | ←           |
| F5321                       | Gap-filling | GGATTAGAAGGGCACCAGTAT                  | 5321–5341       | →           |
| R5970                       | Gap-filling | GGATTACCTGATGGTTGAGAG                  | 5970–5950       | ←           |
| F5686                       | Gap-filling | TGAAATTGGTTTGGGAGT                     | 5686–5703       | →           |
| R6238                       | Gap-filling | AGAGCGATAAGGAGGTGG                     | 6238–6221       | ←           |
| F6382                       | Gap-filling | ACGGATTGCTTCGTTTGA                     | 6382–6399       | →           |
| R7749                       | Gap-filling | TTGGAGCTTGCTAAGGACTG                   | 7749–7730       | ←           |
| F8549                       | 3' RACE     | TTCTGCTGTTGATGATAAGGG                  | 8549–8569       | →           |
| RACEdT                      | 3' RACE     | GCCGGAGCTCTGCAGAATTCT <sub>17</sub> VN | /               | /           |
| BRS                         | 3' RACE     | GCCGGAGCTCTGCAGAATTC                   | /               | /           |

→: forward; ←: reverse.

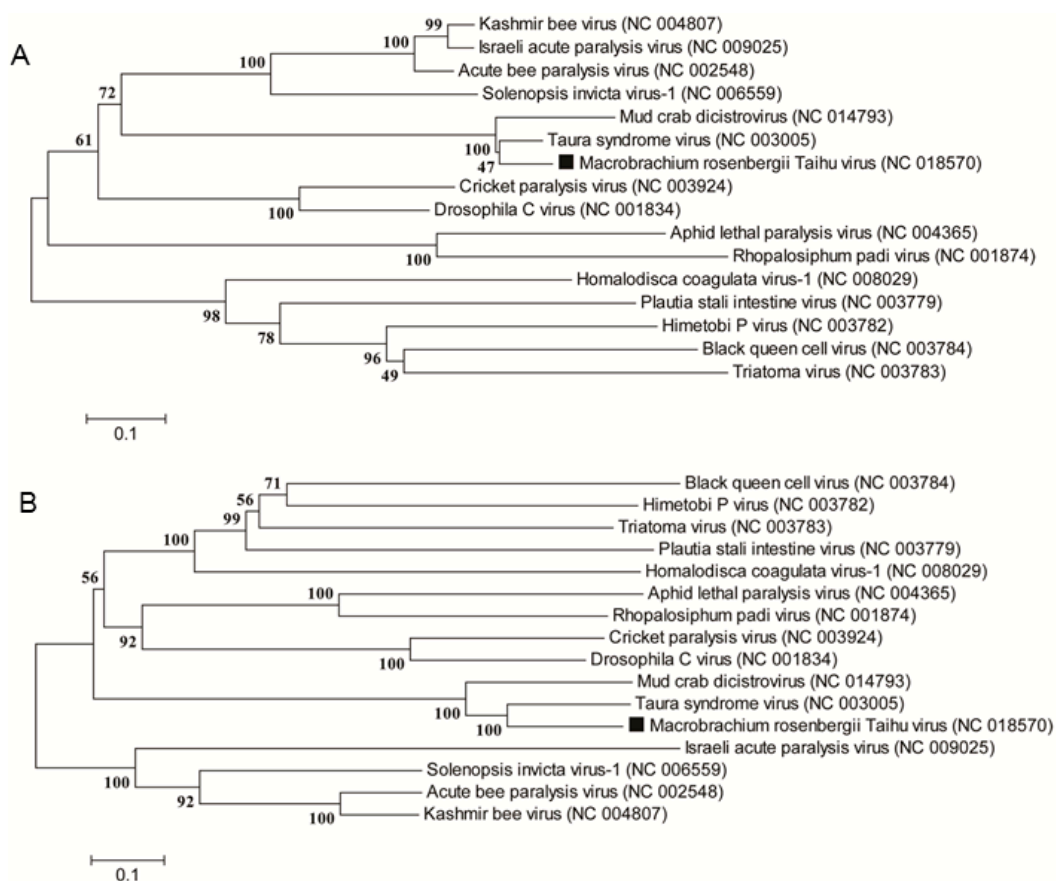

**Figure S1.** Phylogeny of the MrTV and other dicistroviruses. Phylogenetic trees based on the other the deduced amino acid sequence of RNA-dependent RNA polymerase (RdRp) (A) and replicase polyprotein (B) were constructed using the neighbor-joining method with 1000 bootstrap replicates under the parameter of complete deletion and Jones-Taylor-Thornton (JTT) model using MEGA 6.0. The numbers at the branch nodes represent the bootstrap confidence levels of the 1000 bootstrap replications obtained. Bar, 0.1 amino acid substitutions per site. The black squares indicate MrTV.
